# Supplementary material for: Evaluation of carbonyl sulfide biosphere exchange in the Simple Biosphere Model (SiB4)
Source: Copernicus journal article supplement (doi:10.5194/bg-2021-192), 2021-07-26
Supplement: Supplementary file 1 [file bg-2021-192-supplement.pdf]

# Supplementary information for Evaluation of carbonyl sulfide biosphere exchange in the Simple Biosphere Model (SiB4)

Linda M.J. Kooijmans et al.

5 Correspondence to: Linda Kooijmans (linda.kooijmans@wur.nl)

**Table S1. Site information of long-term CO<sub>2</sub> flux measurements from FLUXNET, AmeriFlux or ICOS, including mean annual temperature (MAT) and mean annual precipitation (mm).**

|                                              | Network          | Lat (°N),<br>Lon (°E) | Years         | MAT<br>(°C) | MAP<br>(mm) | Reference                                           |
|----------------------------------------------|------------------|-----------------------|---------------|-------------|-------------|-----------------------------------------------------|
| Hyytiälä,<br>Finland (FI-<br>HYY)            | ICOS             | 61.8,<br>24.3         | 1996-<br>2018 | 3.8         | 709         | Kolari et al. (2009)                                |
| Sorø, Denmark<br>(DK-SOR)                    | ICOS             | 55.5,<br>11.6         | 1996-<br>2018 | 8.2         | 660         | Pilegaard et al. (2011); Wu et al. (2013).          |
| Neustift, Austria<br>(AT-NEU)                | FLUXNET-<br>2015 | 47.1,<br>11.3         | 2002-<br>2012 | 6.5         | 852         | Wohlfahrt et al. (2008)<br>DOI:10.18140/FLX/1440121 |
| Harvard Forest,<br>US (US-HA1)               | FLUXNET-<br>2015 | 42.5,<br>-72.2        | 1991-<br>2012 | 6.6         | 1071        | DOI:10.18140/FLX/1440071                            |
| Fermilab, US<br>(US-IB2)                     | FLUXNET-<br>2015 | 41.8,<br>-88.2        | 2004-<br>2011 | 9.0         | 930         | Matamala et al. (2008)<br>DOI:10.17190/AMF/1246066  |
| Bondville, US<br>(US-BO1)                    | AMERI-<br>FLUX   | 40.0,<br>-88.3        | 1996-<br>2008 | 11.0        | 991         | DOI:10.17190/AMF/1246036                            |
| Majadas, Spain<br>(ES-LM1)                   | ICOS             | 39.9,<br>-5.8         | 2014-<br>2018 | 16.0        | 700         | El-Madany et al. (2018)                             |
| ARM Southern<br>Great Plains, US<br>(US-ARM) | FLUXNET-<br>2015 | 36.6,<br>-97.5        | 2003-<br>2012 | 14.8        | 843         | DOI:10.18140/FLX/1440066                            |

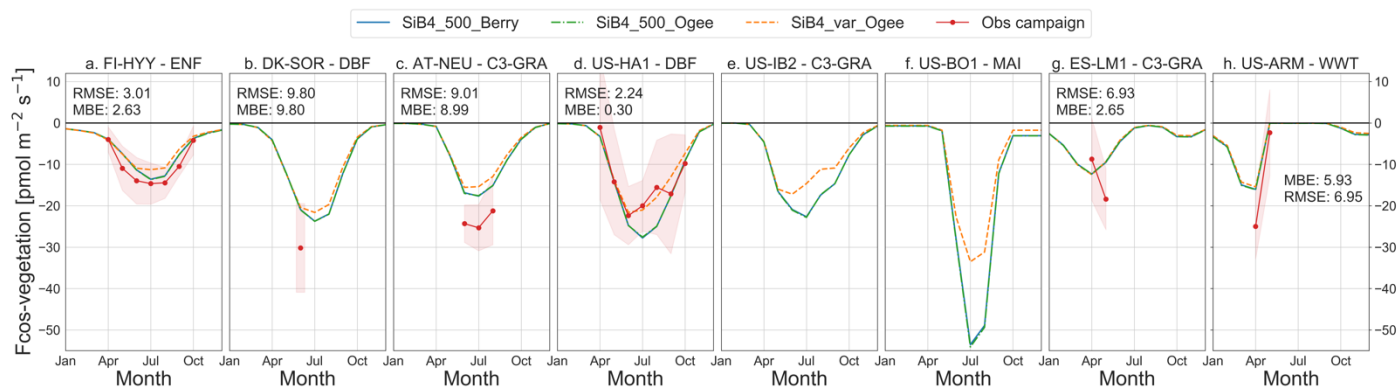

**Figure S1. Comparison of COS vegetation flux seasonal cycles of observations (red) with different SiB4 model runs: SiB4\_500\_Berry (blue, solid), SiB4\_var\_Ogee (orange, dashed), SiB4\_500\_Ogee (green, dot-dash). Monthly averages are shown with the 1 $\sigma$  spread around the mean of observations. Negative values indicate uptake of COS by the ecosystem while positive values indicate COS emissions. The model simulations are from the same year(s) in which observations were made. The MBE and RMSE ( $\text{pmol m}^{-2} \text{s}^{-1}$ ) are given for monthly average fluxes. Sites are presented from high to low latitude.**

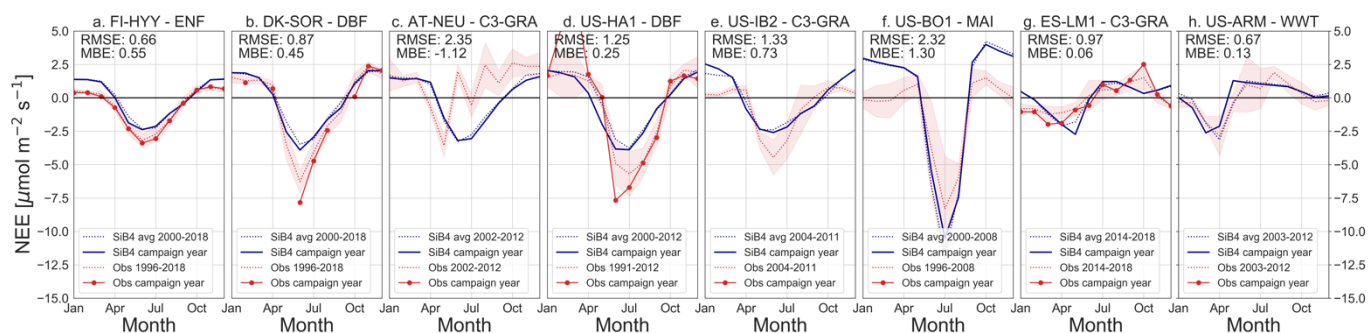

**Figure S2. Comparison of NEE seasonal cycles of SiB4 model simulations (blue) with observations from either FLUXNET, AmeriFlux or ICOS (indicated in legend) (red). Monthly averages are shown with the 1 $\sigma$  spread around the mean of observations. Negative values indicate uptake of CO<sub>2</sub> by the ecosystem while positive values indicate CO<sub>2</sub> emissions. The model simulations represent the years in which observations were made from 2000 onwards. The MBE and RMSE ( $\mu\text{mol m}^{-2} \text{s}^{-1}$ ) are given for monthly average fluxes.**

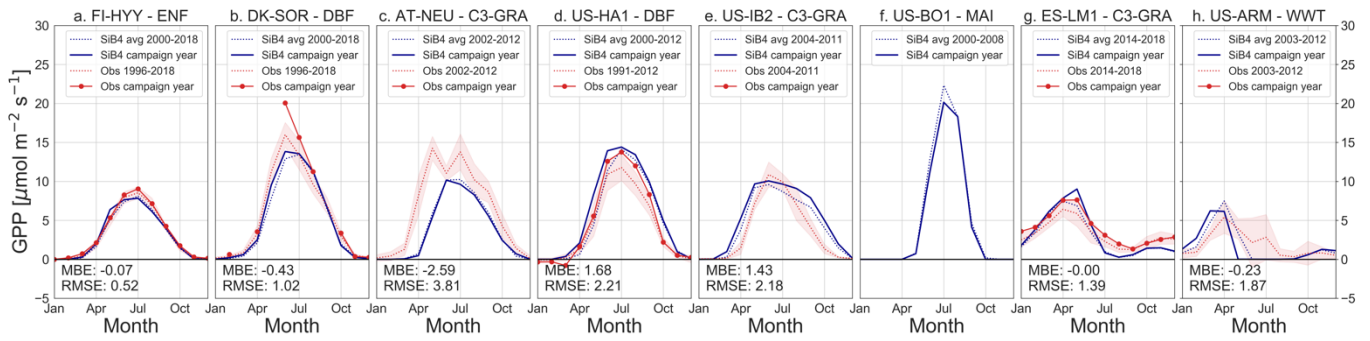

**Figure S3. Comparison of GPP seasonal cycles of SiB4 model simulations (blue) with observations from either FLUXNET, AmeriFlux or ICOS (indicated in legend) (red). Monthly averages are shown with the  $1\sigma$  spread around the mean of observations. The model simulations represent the years in which observations were made from 2000 onwards. The MBE and RMSE ( $\mu\text{mol m}^{-2} \text{s}^{-1}$ ) are given for monthly average fluxes.**

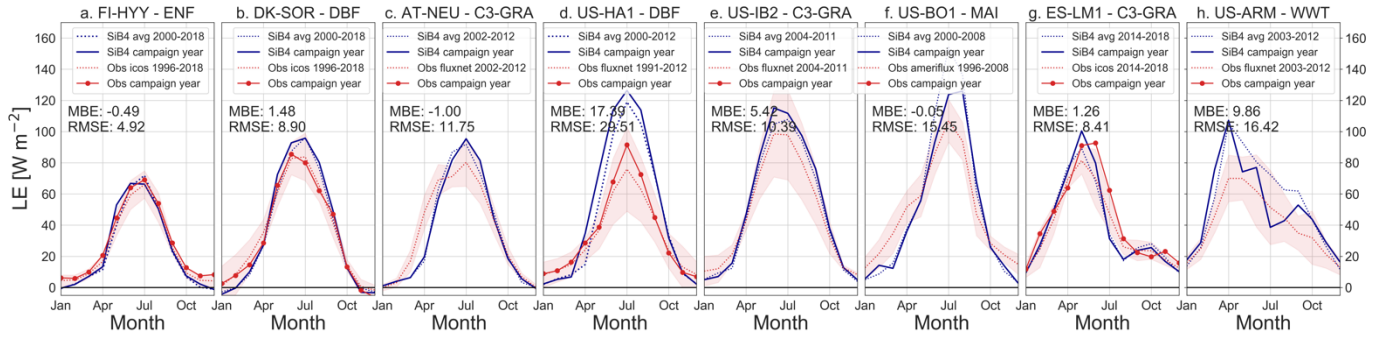

**Figure S4. Comparison of LE seasonal cycles of SiB4 model simulations (blue) with observations from either FLUXNET, AmeriFlux or ICOS (indicated in legend) (red). The model simulations represent the years in which observations were made from 2000 onwards. The MBE and RMSE ( $\text{W m}^{-2}$ ) are given for monthly average fluxes.**

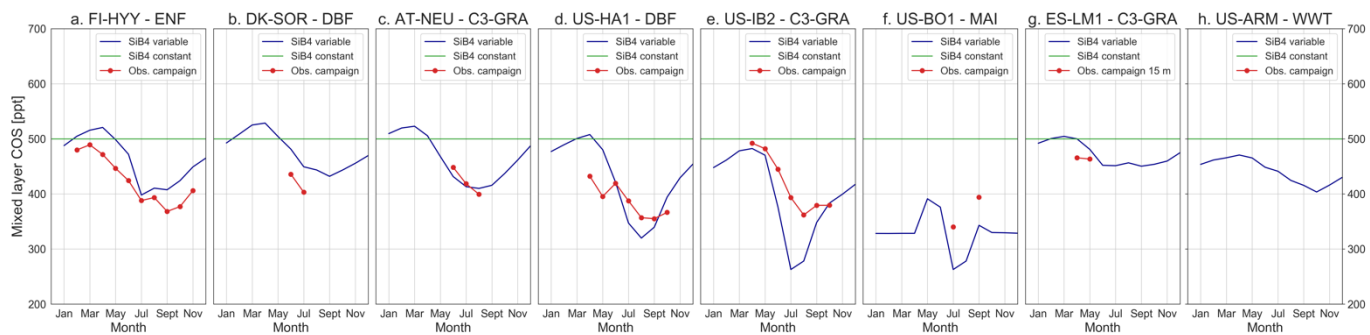

**Figure S5: Seasonal cycles of COS mole fractions as used in the SiB4 simulations (blue and green) together with observed COS mole fractions above or in the canopy. No COS mole fraction observations are available for US-ARM.**

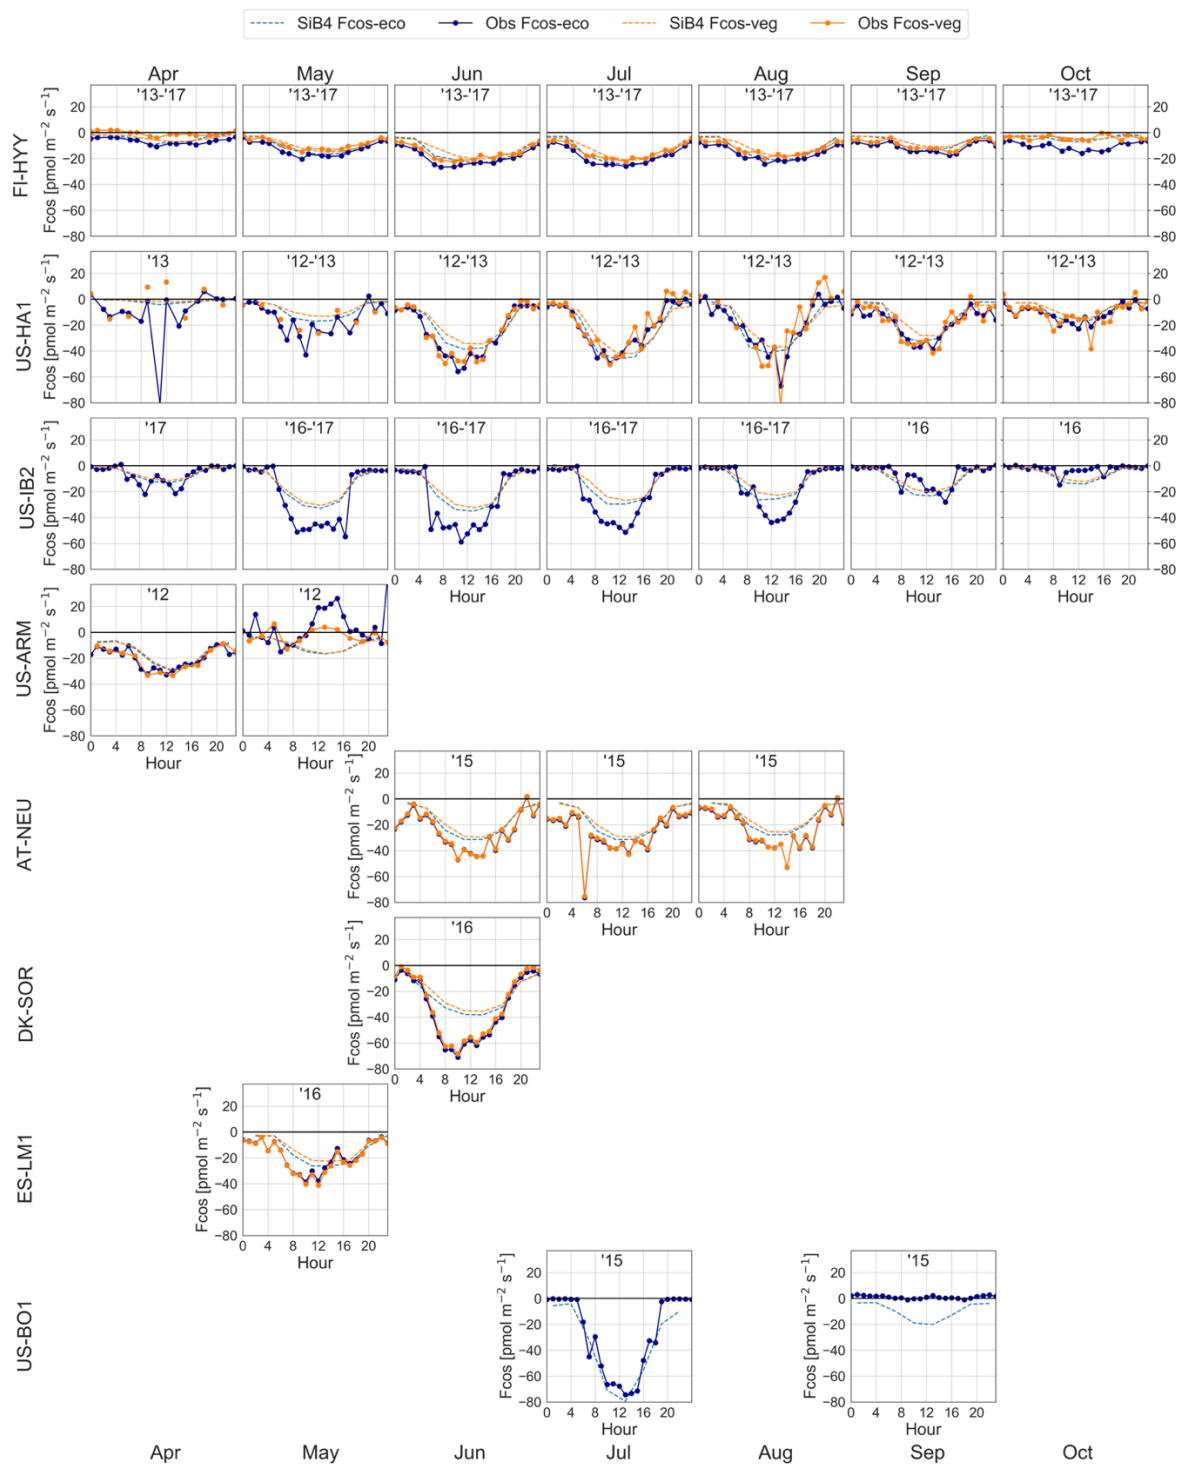

45

**Figure S6. Diurnal cycles of COS ecosystem (blue) and vegetation (orange) fluxes as observed (dotted line) and simulated (dashed line) per month and per site. Model results represent settings from SiB4\_var\_Ogee. Negative values indicate uptake of COS by the ecosystem while positive values indicate COS emissions.**

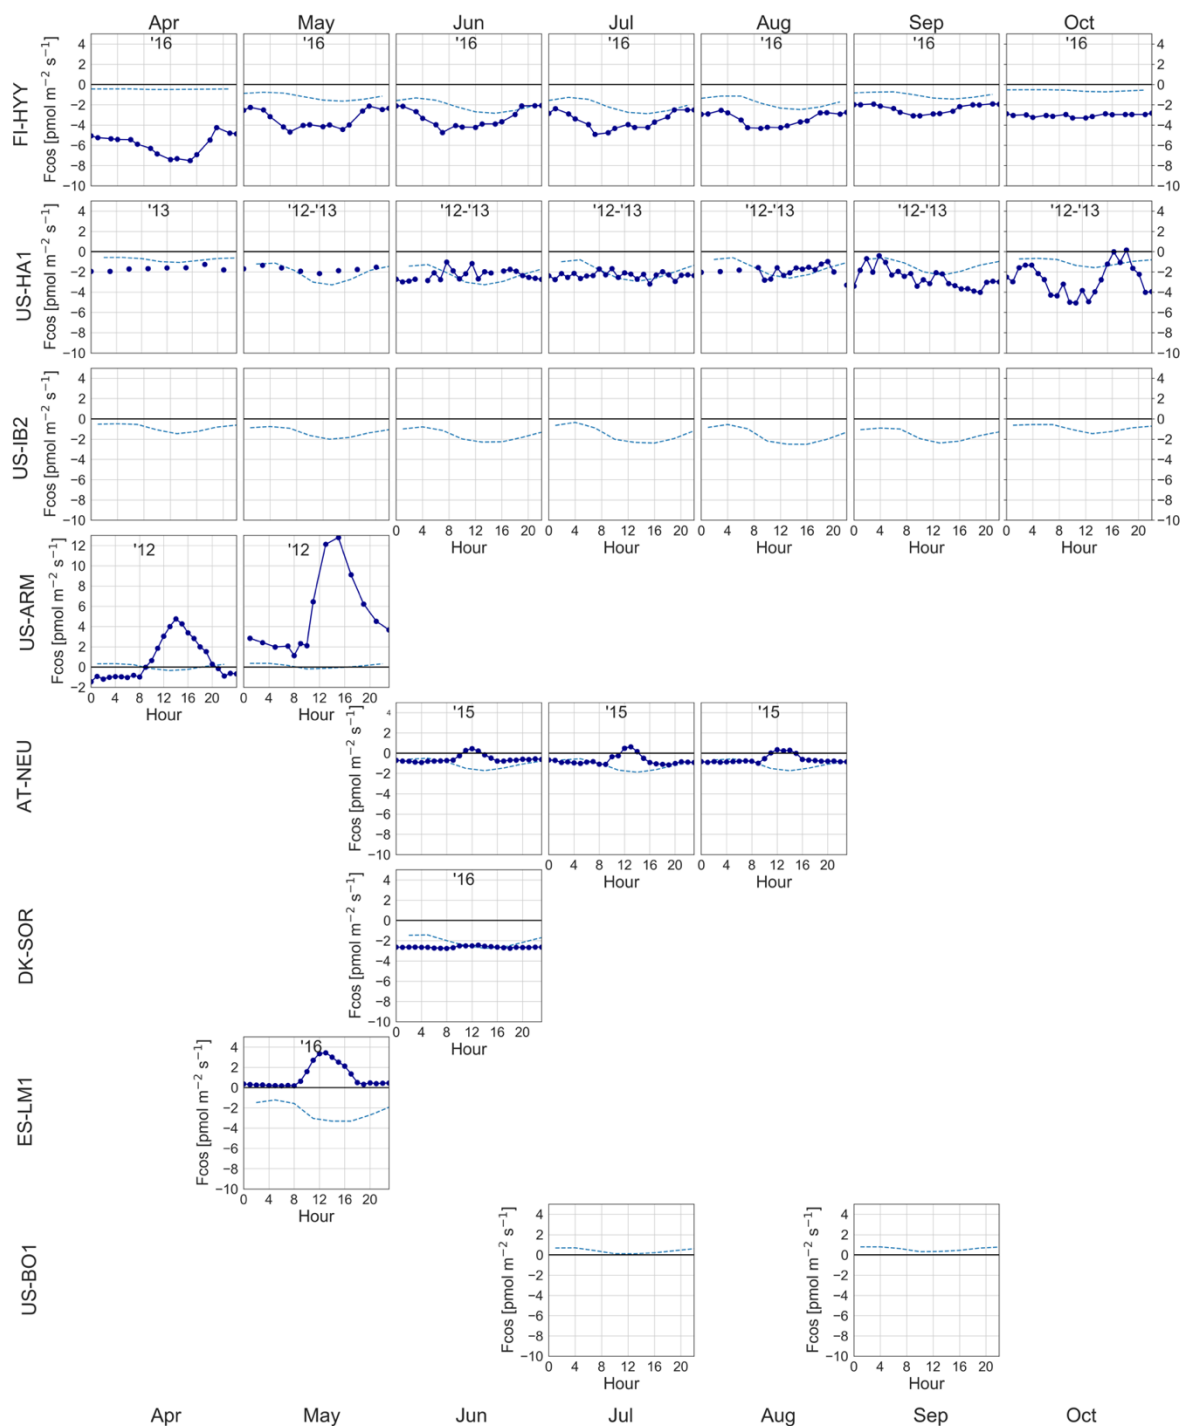

50 **Figure S7. Diurnal cycles of COS soil fluxes as observed (dotted line) and simulated (dashed line) per month and per site. Model results represent settings from SIB4\_year\_Ogee. Positive fluxes represent uptake by the soil. Negative values indicate uptake of COS by the ecosystem while positive values indicate COS emissions.**

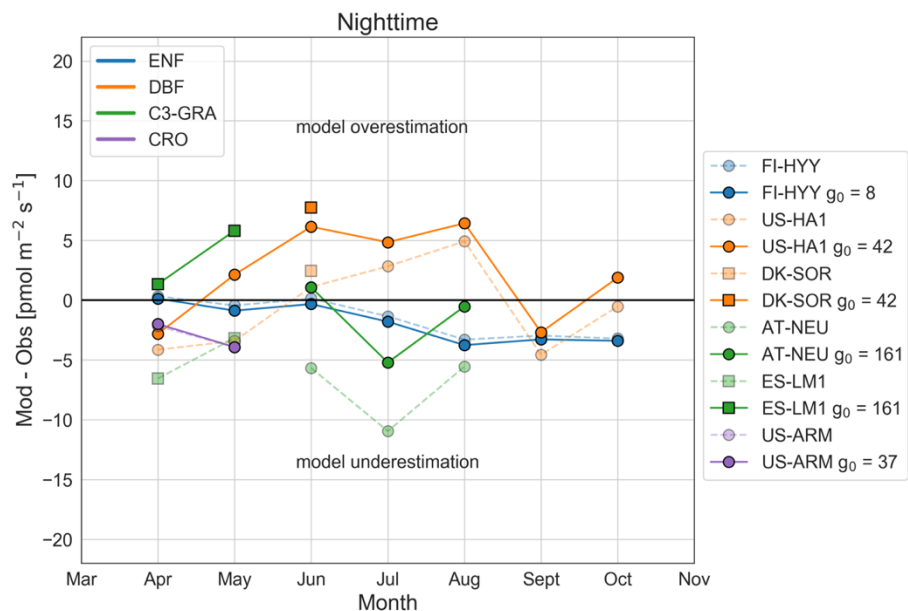

55 **Figure S8.** Difference between model simulations and observations of monthly average COS vegetation fluxes (ecosystem – soil) for  
nighttime data (21 – 03 hr) based on two different minimum stomatal conductance settings. The runs with original SiB4 minimum  
stomatal conductance values ( $10 \text{ mmol m}^{-2} \text{ s}^{-1}$  for most PFTs, and  $40 \text{ mmol m}^{-2} \text{ s}^{-1}$  for C4 plants and crops) are shown as transparent  
dashed lines (equal to those shown in Fig. 3 of the main text). The runs with modified minimum stomatal conductance as adopted  
60 by Lombardozzi et al. (2017) (values indicated in the legend, unit in  $\text{mmol m}^{-2} \text{ s}^{-1}$ , see also Table S2) are shown as solid lines. All runs  
are done with settings following SiB4\_var\_Ogee.

**Table S2.** Minimum stomatal conductance ( $g_0$ ) values used as default in SiB4 and those adopted from Lombardozzi et al. (2017).  
Units are in  $\text{mmol m}^{-2} \text{ s}^{-1}$ .

| PFT    | Sites              | Default<br>SiB4 $g_0$ | Adjusted<br>$g_0$ |
|--------|--------------------|-----------------------|-------------------|
| ENF    | FI-HYY             | 10                    | 8                 |
| DBF    | US-HA1, DK-<br>SOR | 10                    | 42                |
| C3-GRA | AT-NEU, ES-<br>LM1 | 10                    | 161               |
| WWT    | US-ARM             | 40                    | 37                |

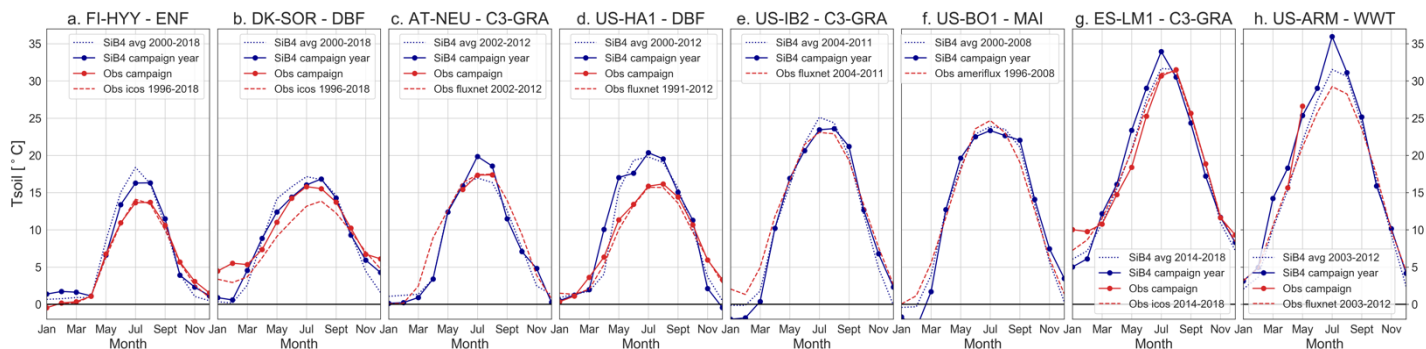

**Figure S9.** Comparison of soil temperature seasonal cycles as measured by the FLUXNET, AmeriFlux or ICOS network at 0.05 m (red) and simulated in the upper two soil layers (0-0.13 m by the SiB4 model (blue). The model simulations are from the same year(s) in which observations were made.

80

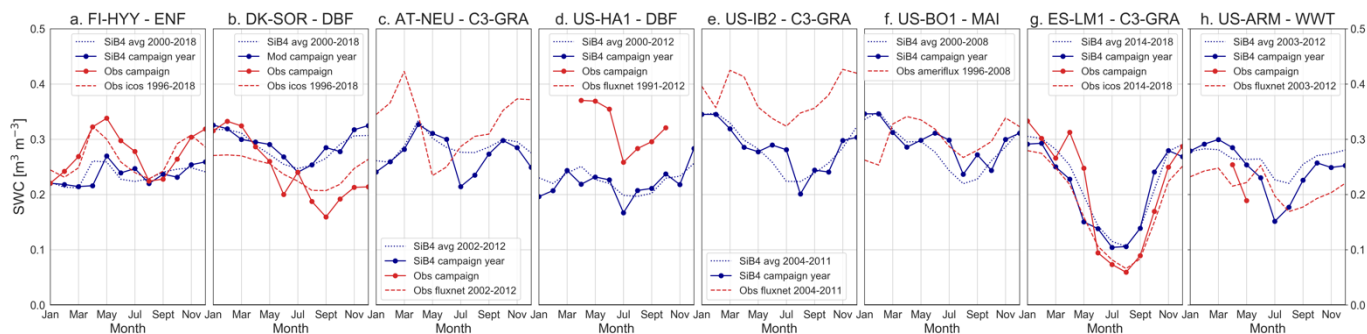

**Figure S10.** Comparison of soil moisture as measured by the FLUXNET, AmeriFlux or ICOS network at 0.05 m (red) and simulated in the upper two soil layers (0-0.13 m) by the SiB4 model (blue). The model simulations are from the same year(s) in which observations were made.

85



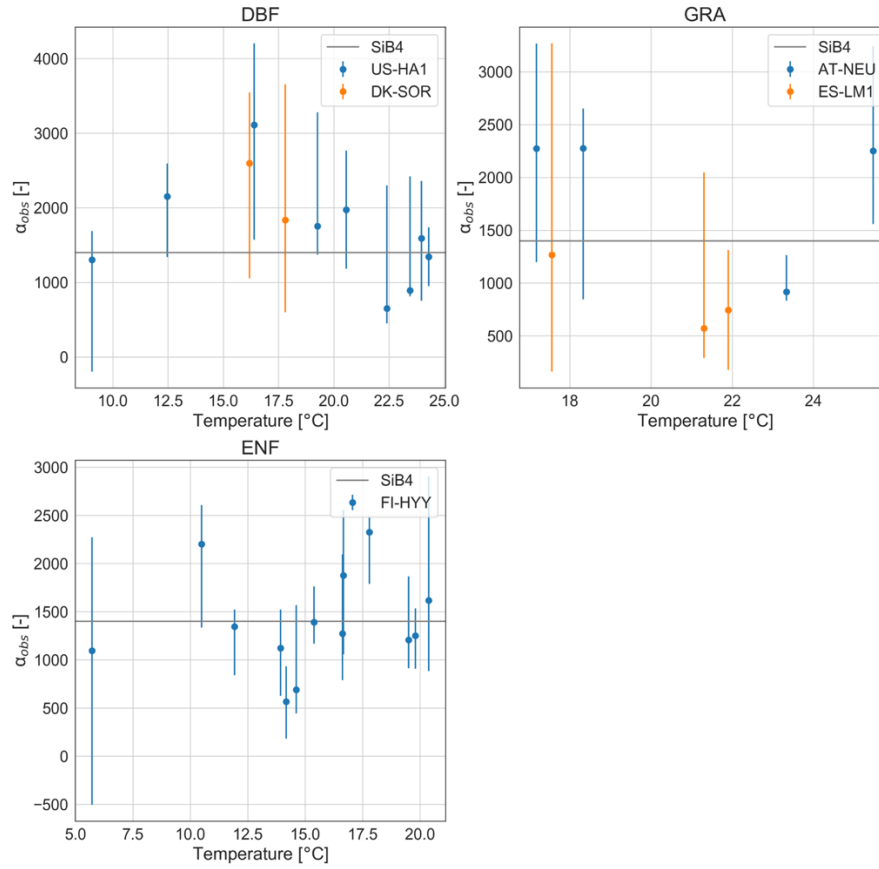

**Figure S11.** Correlation of  $\alpha_{obs}$  against air temperature based on two-weekly medians, separated by PFT. Error bars represent the 25<sup>th</sup>-75<sup>th</sup> percentiles.

90

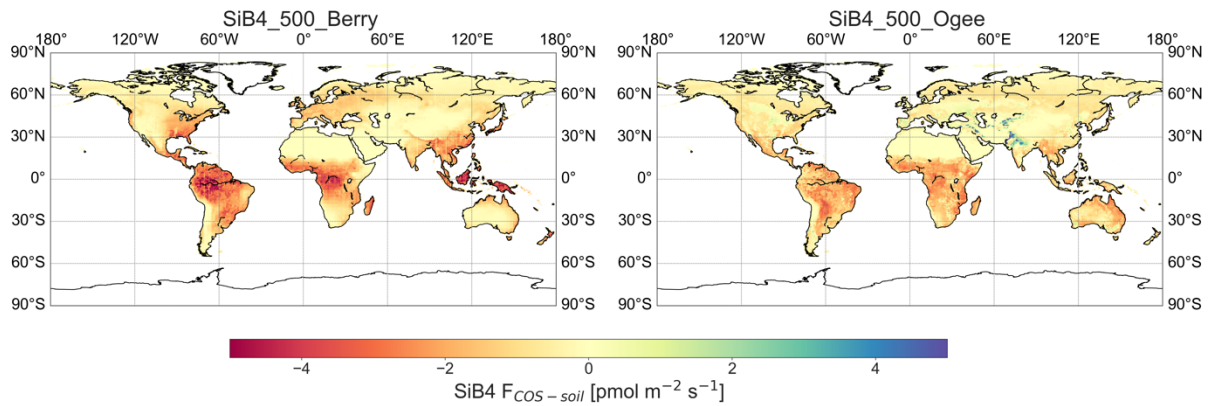

**Figure S12.** Global distribution of the COS soil flux as simulated by SiB4\_500\_Berry (left) and SiB4\_500\_Ogee. Negative values indicate uptake of COS by the biosphere while positive values indicate COS emissions.

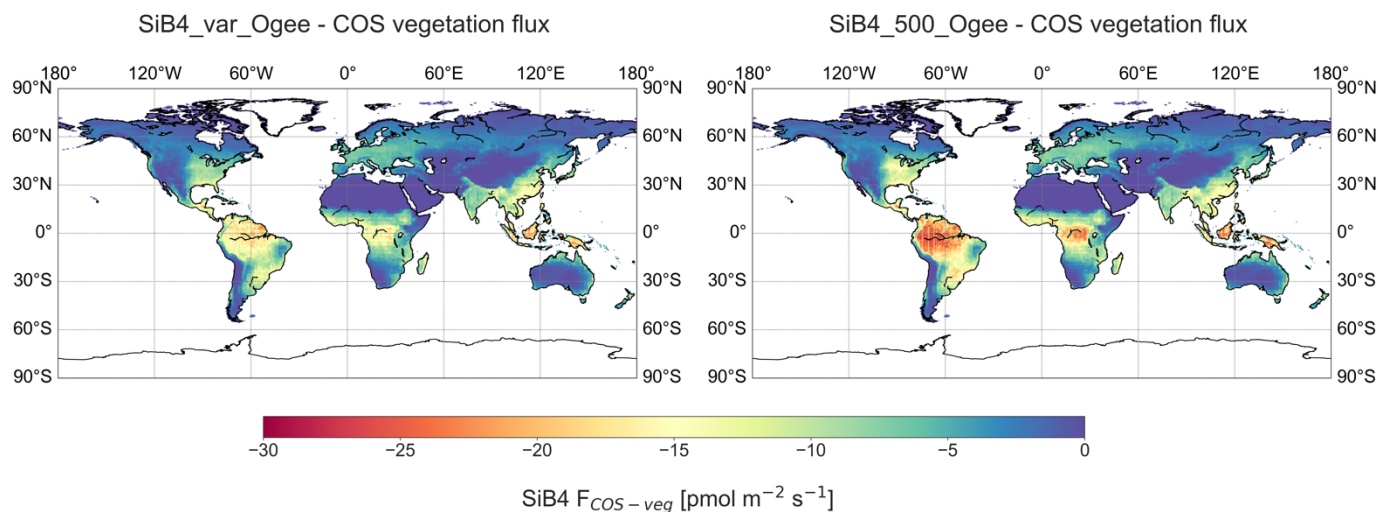

**Figure S13. Global distribution of the COS vegetation flux as simulated by SiB4\_var\_Ogee (left) and SiB4\_500\_Ogee (right). Negative values indicate uptake of COS by the biosphere while positive values indicate COS emissions.**

### References in supplementary information

- El-Madany, T. S., Reichstein, M., Perez-Priego, O., Carrara, A., Moreno, G., Pilar Martín, M., Pacheco-Labrador, J., Wohlfahrt, G., Nieto, H., Weber, U., Kolle, O., Luo, Y.-P., Carvalhais, N. and Migliavacca, M.: Drivers of spatio-temporal variability of carbon dioxide and energy fluxes in a Mediterranean savanna ecosystem, *Agric. For. Meteorol.*, 262, 258–278, doi:https://doi.org/10.1016/j.agrformet.2018.07.010, 2018.
- Kolari, P., Kulmala, L., Pumpanen, J., Launiainen, S., Ilvesniemi, H., Hari, P. and Nikinmaa, E.: CO<sub>2</sub> exchange and component CO<sub>2</sub> fluxes of a boreal Scots pine forest, *Boreal Environ. Res.*, 14, 761–783, 2009.
- Lombardozzi, D. L., Zeppel, M. J. B., Fisher, R. A. and Tawfik, A.: Representing nighttime and minimum conductance in CLM4.5: global hydrology and carbon sensitivity analysis using observational constraints, *Geosci. Model Dev.*, 10(1), 321–331, doi:10.5194/gmd-10-321-2017, 2017.
- Matamala, R., Jastrow, J. D., Miller, R. M. and Garten, C. T.: Temporal changes in C and N stocks of restored prairie: Implications for C sequestration strategies, *Ecol. Appl.*, 18(6), 1470–1488, doi:https://doi.org/10.1890/07-1609.1, 2008.
- Pilegaard, K., Ibrom, A., Courtney, M. S., Hummelshøj, P. and Jensen, N. O.: Increasing net CO<sub>2</sub> uptake by a Danish beech forest during the period from 1996 to 2009, *Agric. For. Meteorol.*, 151(7), 934–946, doi:https://doi.org/10.1016/j.agrformet.2011.02.013, 2011.
- Wohlfahrt, G., Hammerle, A., Haslwanter, A., Bahn, M., Tappeiner, U. and Cernusca, A.: Seasonal and inter-annual variability of the net ecosystem CO<sub>2</sub> exchange of a temperate mountain grassland: Effects of weather and management, *J. Geophys. Res. Atmos.*, 113(D8), doi:https://doi.org/10.1029/2007JD009286, 2008.

Wu, J., Larsen, K. S., van der Linden, L., Beier, C., Pilegaard, K. and Ibrom, A.: Synthesis on the carbon budget and cycling in a Danish, temperate deciduous forest, *Agric. For. Meteorol.*, 181, 94–107, doi:<https://doi.org/10.1016/j.agrformet.2013.07.012>, 2013.
